# Supplementary material for: Rapid and sensitive colorimetric detection of dopamine based on the enhanced-oxidase mimicking activity of cerium(iv)
Source: Royal Society of Chemistry journal article supplement (doi:10.1039/d1nj00162k), 2021-01-01
Supplement: d1nj00162k1.pdf [file d1nj00162k1.pdf]

## **New Journal of Chemistry**

### **Electronic Supplementary Material**

#### **Rapid and sensitive colorimetric detection of dopamine based on the enhanced-oxidase mimicking activity of cerium(IV)**

**Ling Liang, Zhenghong Zhao, Fanggui Ye\* and Shulin Zhao**

State Key Laboratory for the Chemistry and Molecular Engineering of Medicinal Resources, College of Chemistry and Pharmaceutical Science of Guangxi Normal University, Guilin 541004, P. R. China.

\*Corresponding author: Prof. Fanggui Ye, E-mail: fangguiye@163.com

Tel: +86-773-5856104; fax: +86-773-5832294

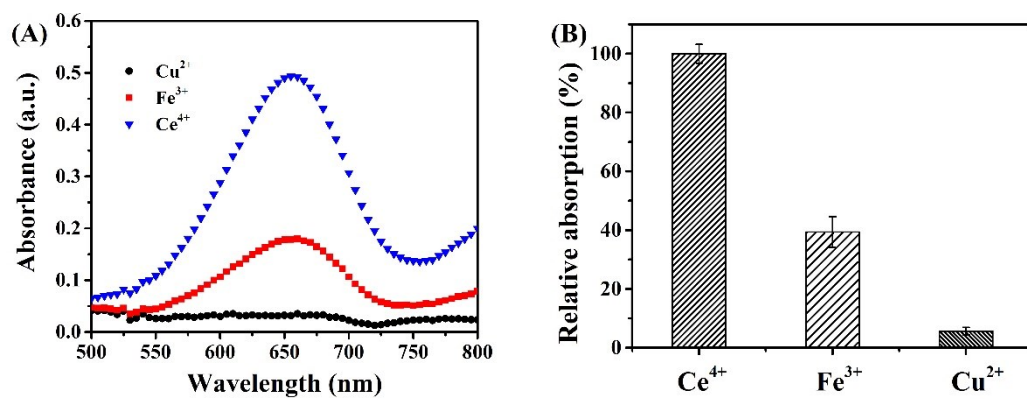

**Fig. S1** UV-Vis absorbance spectra (A) and the relative absorption (B) of oxidizing TMB by different metal ions ( $0.1 \text{ mg mL}^{-1}$ ) in the presence of DA.

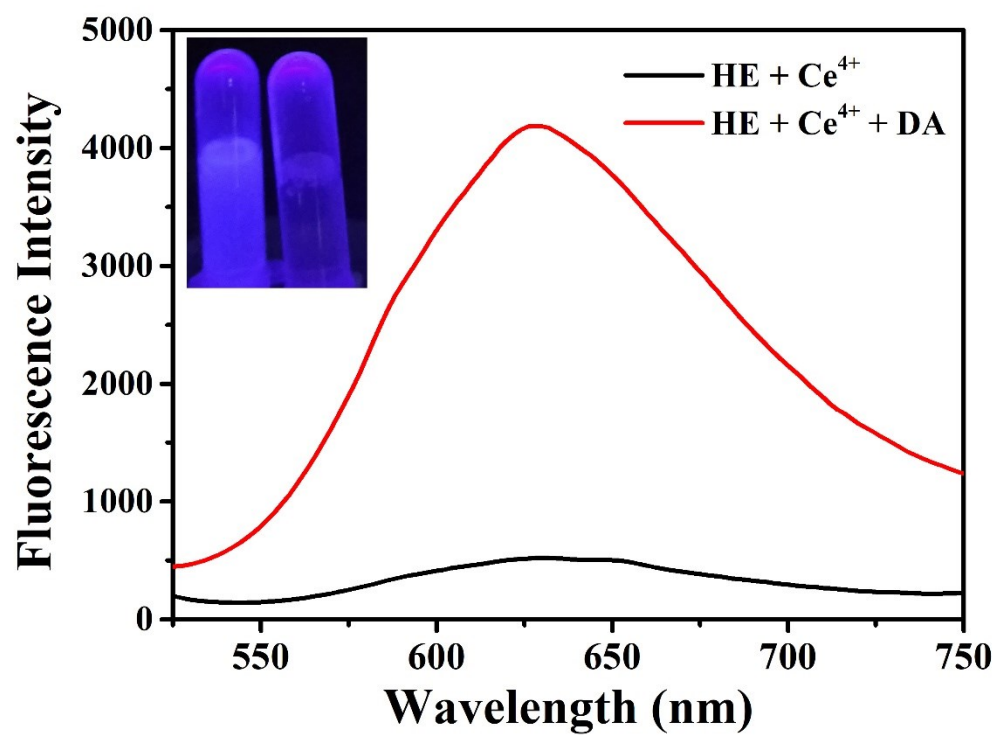

**Fig. S2** Fluorescence spectrum of  $\text{Ce}^{4+}$  before and after the reaction with DA in the presence of HE (0.1 mM) probes. Inset: the corresponding photograph of different solutions under illumination of a UV lamp.

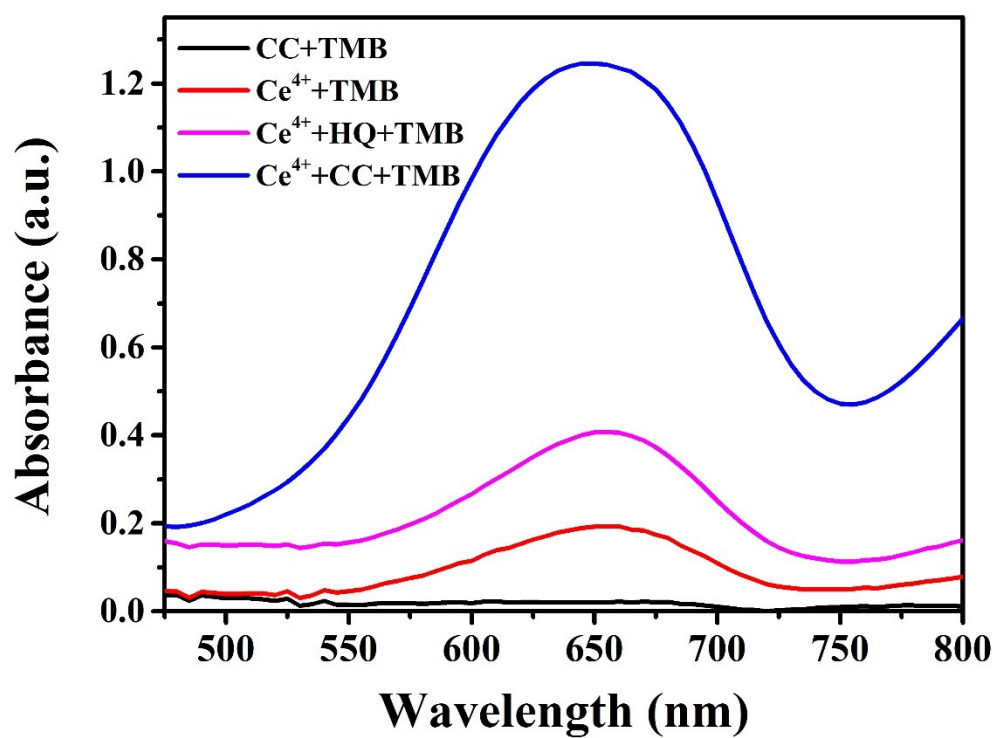

**Fig. S3** UV-Vis absorption spectra of TMB (0.6 mM) in different systems (0.65  $\mu\text{M}$  CC/HQ, 0.16  $\text{mg mL}^{-1}$   $\text{Ce}^{4+}$ ).

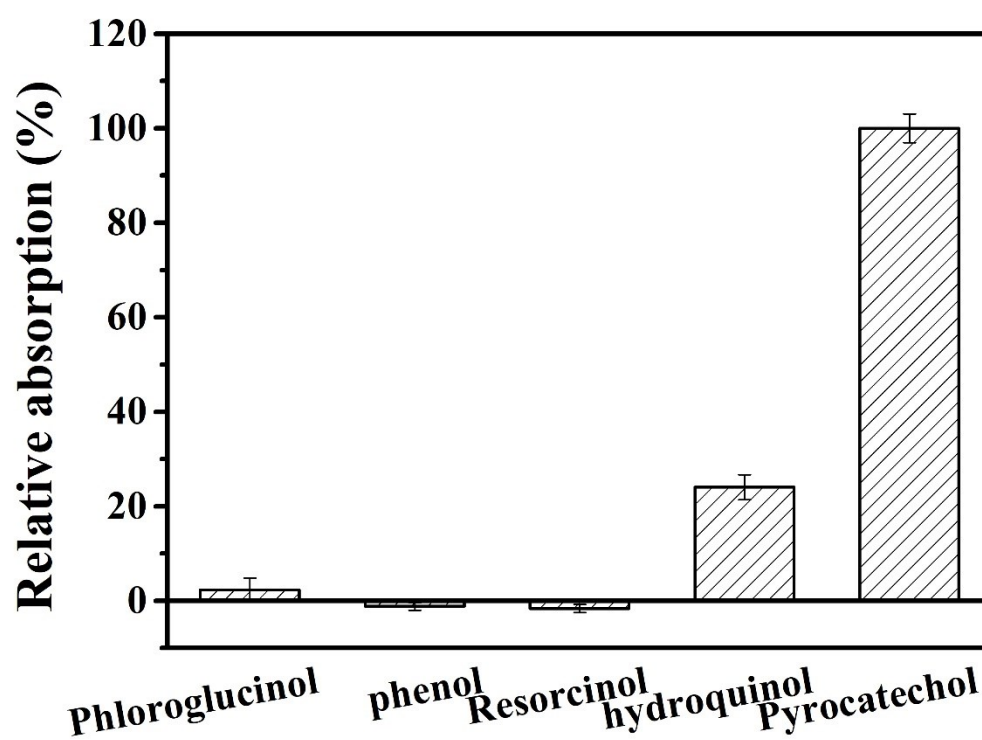

**Fig. S4** The relative absorption of oxidizing TMB by Ce<sup>4+</sup> in the presence of different phenols (0.65  $\mu$ M).

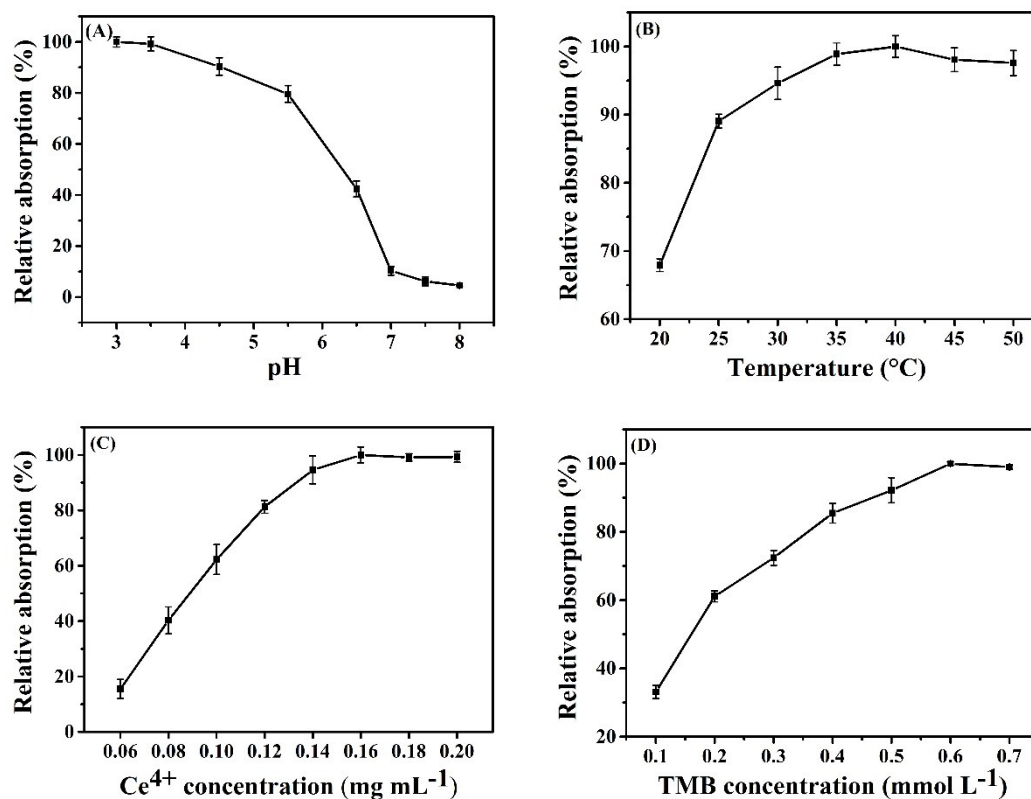

**Fig. S5** The optimization of (A) pH, (B) temperature and concentrations of (C) Ce<sup>4+</sup>, (D) TMB for DA sensing. The error bars represent the standard deviation of three trials. (Relative absorption (%) =  $\Delta A / \Delta A (\text{max}) \times 100\%$ ,  $\Delta A = A - A_0$ , A and A<sub>0</sub> represent the absorption value of Ce<sup>4+</sup>-TMB system with the existence or nonexistence of DA, respectively.) The highest absorption was set as 100%.

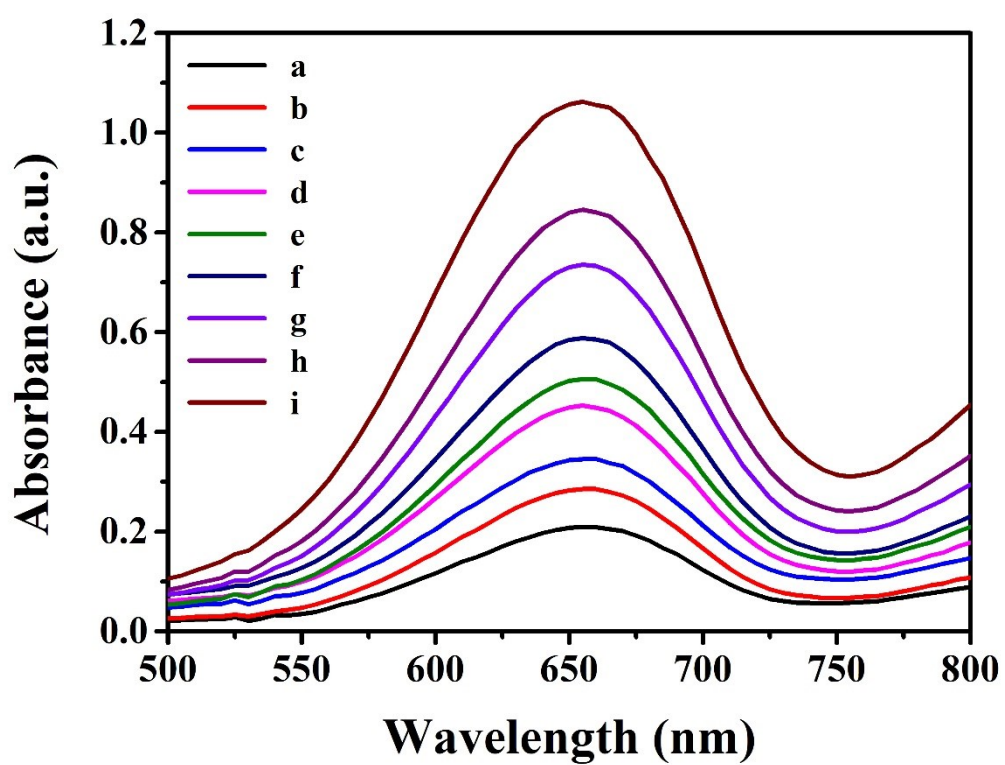

**Fig. S6** Detection of DA in urine samples. (a) 0  $\mu\text{M}$ , (b) 0.01  $\mu\text{M}$ , (c) 0.05  $\mu\text{M}$ , (d) 0.1  $\mu\text{M}$ , (e) 0.15  $\mu\text{M}$ , (f) 0.2  $\mu\text{M}$ , (g) 0.25  $\mu\text{M}$ , (h) 0.35  $\mu\text{M}$ , (i) 0.45  $\mu\text{M}$  DA were spiked to the assay system, respectively.

**Table S1.** Results for the determination of DA in human serum samples

| Sample  | Original content | Added (nM) | Found (nM) | Recovery (%) | RSD (% <sub>n=3</sub> ) |
|---------|------------------|------------|------------|--------------|-------------------------|
| Serum 1 | ND               | 18         | 16.6       | 92.2         | 4.0                     |
|         | ND               | 180        | 170.3      | 94.6         | 2.2                     |
|         | ND               | 360        | 348.9      | 96.9         | 4.4                     |
| Serum 2 | ND               | 18         | 16.8       | 93.3         | 2.4                     |
|         | ND               | 180        | 168.6      | 93.7         | 3.3                     |
|         | ND               | 360        | 338.9      | 94.1         | 5.2                     |

ND: not detected.
